# Supplementary material for: Neuroimaging and immunofluorescence of the Pseudopus apodus brain: unraveling its structural complexity
Source: Research Square preprint supplement (doi:10.21203/rs.3.rs-6294287/v1), 2025-04-03
Supplement: Supplementary file 1 [file 2a51c81ddbfc8185c1cf014a.docx]

| **Name** | **Immunogen** | **Commercial supplier** | **Dilution** |
| --- | --- | --- | --- |
| **CB** | E-coli-produced recombinant rat calbindin D-28 k | Polyclonal rabbit anti-calbindin D-28; Swant, Bellinzona, Switzerland. Catalog No. CB-38a | 1:500 |
| **ChaT** | Developmental Studies Hybridoma Bank, mouse monoclonal, Cat# 40.2D6 | Mouse monoclonal, Developmental Studies Hybridoma Bank. Catalog No. 40.2D6 | 1:100 |
| **CR** | E-coli-produced recombinant human calretinin | Polyclonal rabbit anti-calretinin; Swant, Bellinzona, Switzer- land. Catalog No. 7699/4 | 1:1,000 |
| **Isl1** | Amino acids 247–349 at the C-terminus of rat Islet 1 | Mouse monoclonal, Developmental Studies Hybridoma Bank. Catalog No. 40.2D6 | 1:500 |
| **Satb1** | Amino acids 241-310 located in the internal region of human-origin SATB1 | Monoclonal mouse, Santa Cruz. Catalog No. sc-376096 | 1:100 |
| **Ser (5-HT)** | Serotonin coupled to BSA with paraformaldehyde | Polyclonal rabbit anti-5-HT, Immunostar. Catalog No: 20080 | 1:1,000 |
| **TH** | TH purified from rat pheochromocytoma cells | Mouse monoclonal, ImmunoStar. Catalog No. P22941 | 1:1,000 |

**Table 1.** List of primary and secondary antibodies used, immunogen, commercial supplier and dilution.
